# Supplementary material
Source: PubMed Central journal article supplement (PMC9440898)
Supplement: 41467_2022_32814_MOESM1_ESM.pdf [file 41467_2022_32814_MOESM1_ESM.pdf]

## **Supplementary Information**

**Title:** Interrupted-time-series analysis of the immediate impact of COVID-19 mitigation measures on preterm birth in China

**Authors:** Yanxia Xie et al.

### **Included Files**

**Supplementary Fig. 1-6**

**Supplementary Table 1-3**

## Supplementary Figures

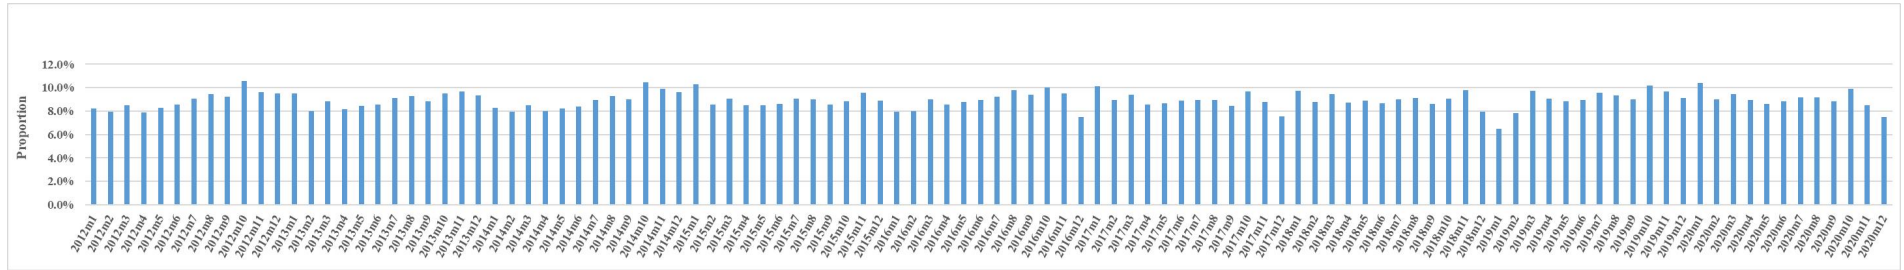

**Supplementary Fig. 1** The proportion of monthly monitored births to the annual monitored births in NMNMS, 2012-2020.

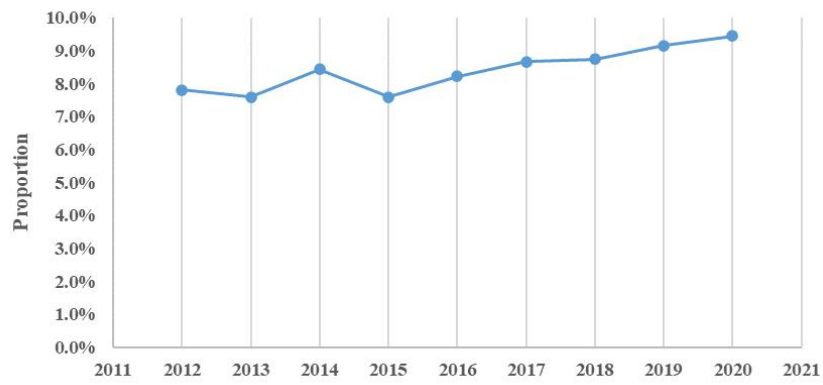

**Supplementary Fig. 2** The proportion of annual monitored births in NMNMSS to the national births in China, 2012-2020.

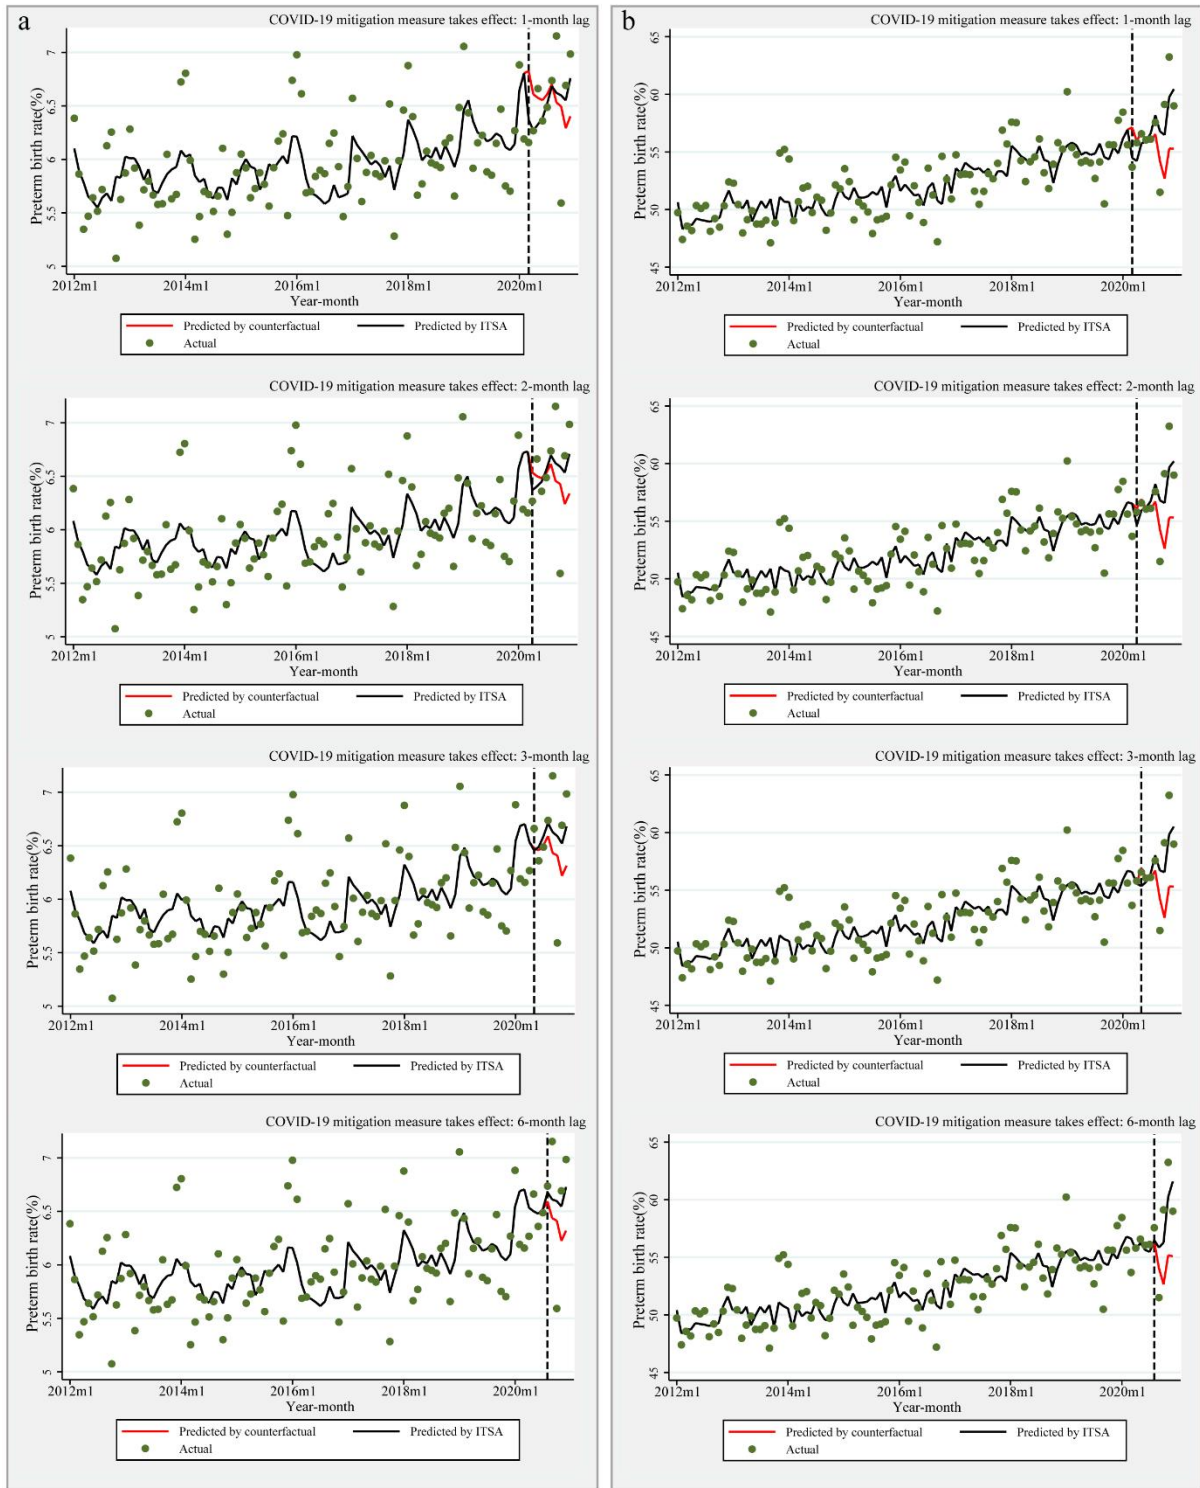

**Supplementary Fig. 3** Interrupted time series analysis (ITSA) of preterm birth rates at 1-, 2-, 3-, and 6-month lags after the implementation of COVID-19 mitigation measures among singleton and multiple births in China, 2012-2020. (a) singleton births; (b) multiple births. Dots indicate true monthly stillbirth rates; solid lines indicate the mean of estimated stillbirth rates per month by ITSA model, and red solid lines indicate the mean of estimated preterm birth rates per month assuming that COVID-19 mitigation measures had not occurred by ordinary least-squares regression with Newey-West standard errors. Baseline: from January 1, 2012 to January 31, 2020; Intervention stage:

from February 1, 2020 to December 31, 2020. Intercept change: change in level compared with the previous stage; slope change: change in trend compared with the previous stage, per month. COVID-19: coronavirus disease 2019. The  $p$  values are two-sided.

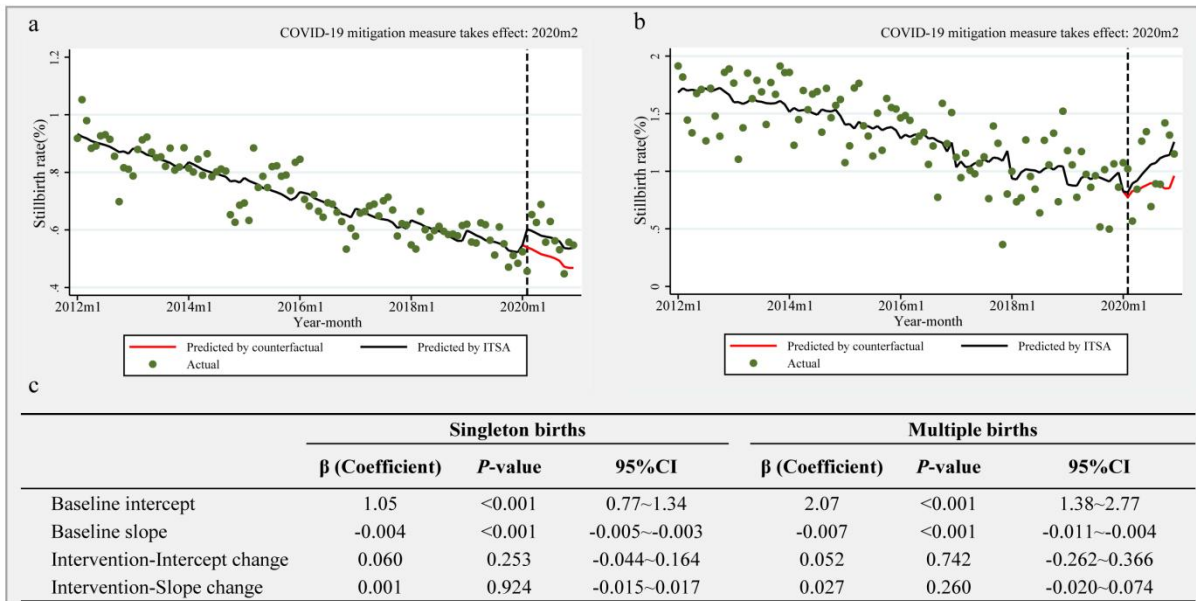

**Supplementary Fig. 4** Interrupted time series analysis (ITSA) of stillbirth rates among singletons and multiples in China, 2012-2020. (a) singleton births; (b) multiple births; (c) the result of ITSA across different type pregnancies. Dots indicate true monthly stillbirth rates; solid lines indicate the mean of estimated stillbirth rates per month by ITSA model, and red solid lines indicate the mean of estimated preterm birth rates per month assuming that COVID-19 mitigation measure had not occurred by ordinary least-squares regression with Newey-West standard errors. Baseline: from January 1, 2012 to January 31, 2020; Intervention stage: from February 1, 2020 to December 31, 2020. Intercept change: change in level compared with the previous stage; slope change: change in trend compared with the previous stage, per month. CI: confidence interval; COVID-19: coronavirus disease 2019. The *p* values are two-sided.

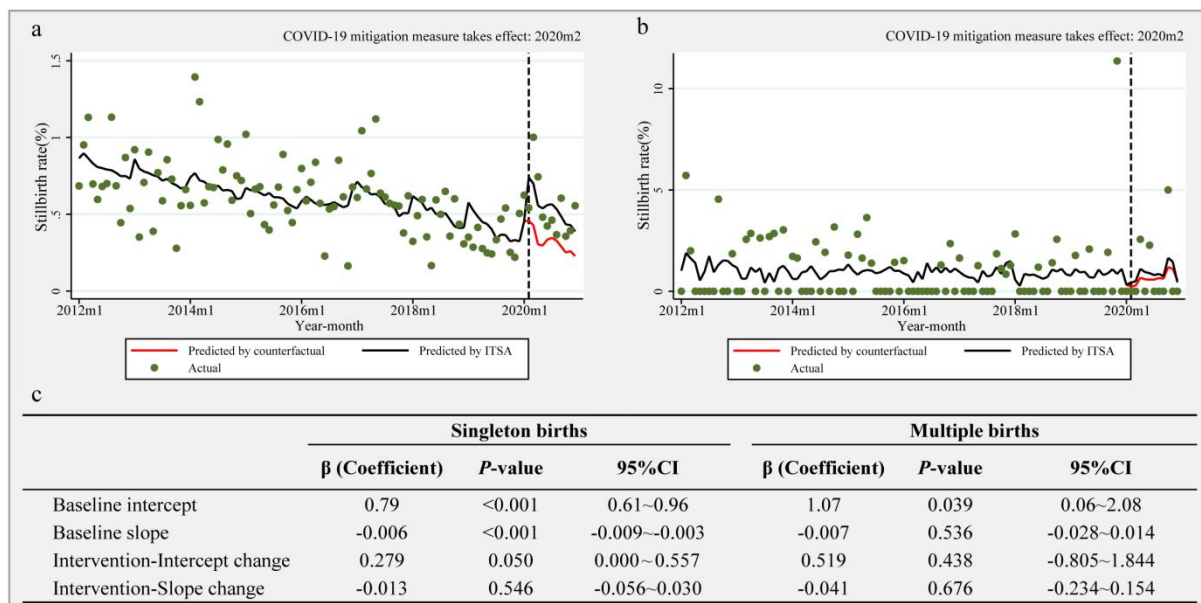

**Supplementary Fig. 5** Interrupted time series analysis (ITSA) of stillbirth rates among singleton and multiple births in Wuhan, China, 2012-2020. (a) singleton births; (b) multiple births; (c) the result of ITSA across different type pregnancies. Dots indicate true monthly stillbirth rates; solid lines indicate the mean of estimated stillbirth rates per month by ITSA model, and red solid lines indicate the mean of estimated preterm birth rates per month assuming that COVID-19 mitigation measure had not occurred by ordinary least-squares regression with Newey-West standard errors. Baseline: from January 1, 2012 to January 31, 2020; Intervention stage: from February 1, 2020 to December 31, 2020. Intercept change: change in level compared with the previous stage; slope change: change in trend compared with the previous stage, per month. CI: confidence interval; COVID-19: coronavirus disease 2019. The *p* values are two-sided.

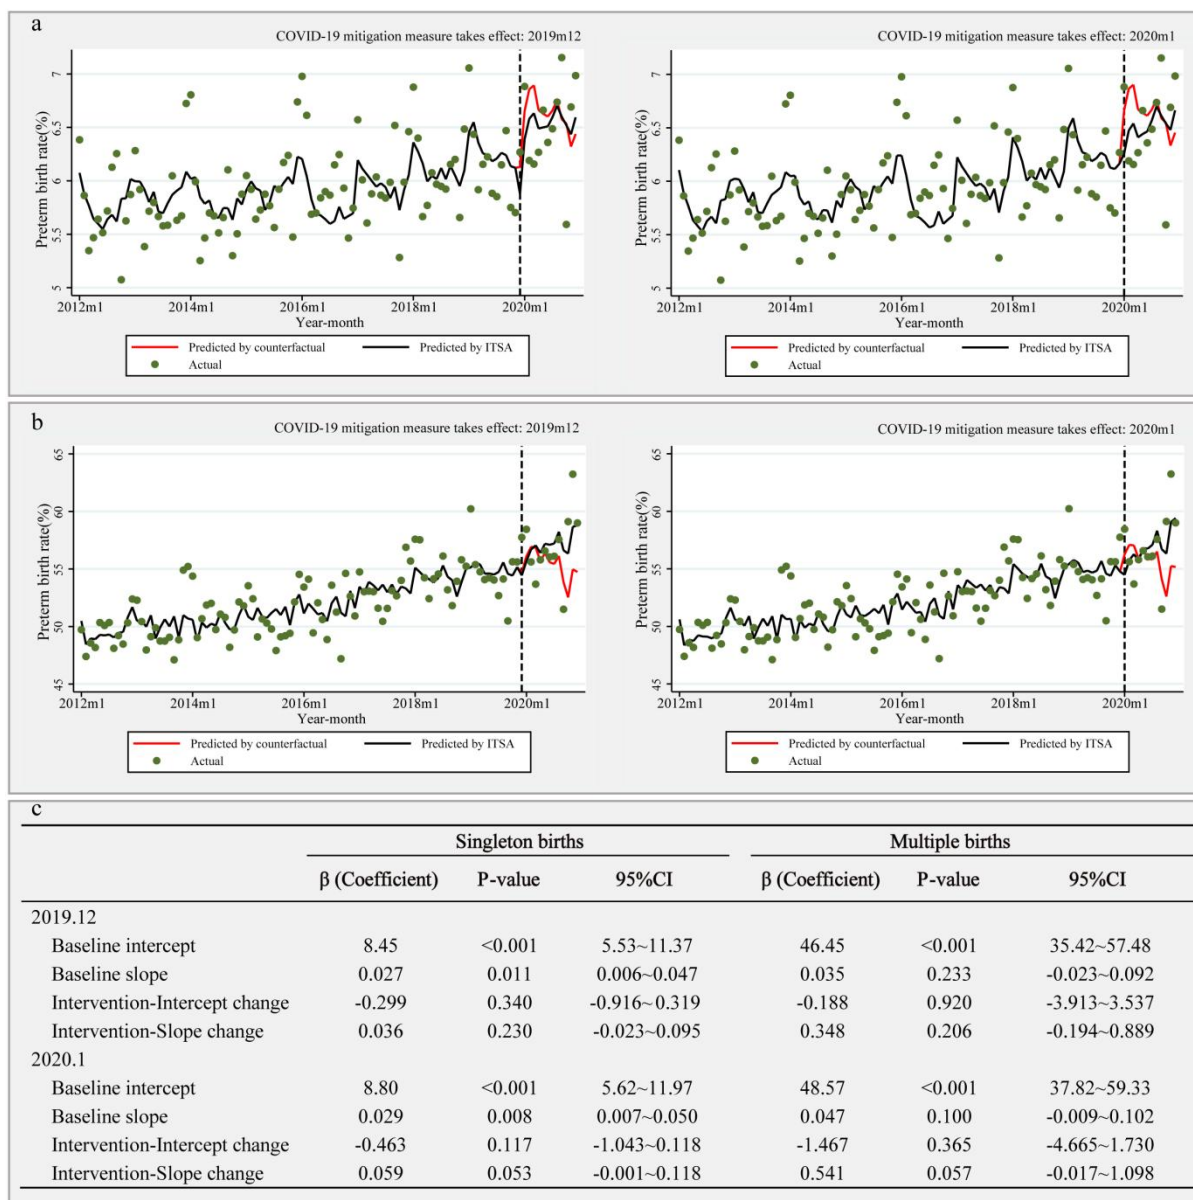

**Supplementary Fig. 6** Interrupted time series analysis (ITSA) of preterm birth rates when the time cut-off is assumed to be December 2019 or January 2020 in China, 2012-2020. (a) singleton births; (b) multiple births; (c) the result of ITSA across different type pregnancies. Dots indicate true monthly stillbirth rates; solid lines indicate the mean of estimated preterm birth rates per month by ITSA model, and red solid lines indicate the mean of estimated preterm birth rates per month assuming that COVID-19 mitigation measure had not occurred by ordinary least-squares regression with Newey-West standard errors. Baseline: from January 1, 2012 to January 31, 2020; Intervention stage: from February 1, 2020 to December 31, 2020. Intercept change: change in level compared with the previous stage; slope change: change in trend compared with the previous stage, per month. CI: confidence interval; COVID-19: coronavirus disease 2019. The  $p$  values are two-sided.



**Supplementary Table 1.** Interrupted time series analysis of monthly preterm birth rate across different lag months in singleton and multiple pregnancies in China, 2012-2020.

|                               | Singleton births      |         |               | Multiple births       |         |               |
|-------------------------------|-----------------------|---------|---------------|-----------------------|---------|---------------|
|                               | $\beta$ (Coefficient) | P-value | 95%CI         | $\beta$ (Coefficient) | P-value | 95%CI         |
| <b>1-month lag</b>            |                       |         |               |                       |         |               |
| Baseline intercept            | 8.38                  | <0.001  | 5.75~11.01    | 50.22                 | <0.001  | 39.83~60.62   |
| Baseline slope                | 0.026                 | 0.005   | 0.008~0.044   | 0.054                 | 0.048   | 0.001~0.108   |
| Intervention-Intercept change | -0.45                 | 0.009   | -0.786~-0.115 | -2.404                | 0.009   | -4.202~-0.606 |
| Intervention-Slope change     | 0.087                 | 0.001   | 0.035~0.139   | 0.874                 | <0.001  | 0.426~1.323   |
| <b>2-month lag</b>            |                       |         |               |                       |         |               |
| Baseline intercept            | 8.03                  | <0.001  | 5.46~10.60    | 48.78                 | <0.001  | 38.21~59.36   |
| Baseline slope                | 0.023                 | 0.014   | 0.005~0.041   | 0.044                 | 0.120   | -0.012~0.100  |
| Intervention-Intercept change | -0.191                | 0.270   | -0.531~0.150  | -0.902                | 0.389   | -2.970~1.166  |
| Intervention-Slope change     | 0.067                 | 0.022   | 0.010~0.125   | 0.792                 | 0.004   | 0.266~1.317   |
| <b>3-month lag</b>            |                       |         |               |                       |         |               |
| Baseline intercept            | 7.88                  | <0.001  | 5.40~10.35    | 49.25                 | <0.001  | 39.95~59.56   |
| Baseline slope                | 0.022                 | 0.016   | 0.004~0.039   | 0.046                 | 0.090   | -0.007~0.100  |
| Intervention-Intercept change | -0.043                | 0.832   | -0.442~0.356  | -0.755                | 0.460   | -2.774~1.265  |
| Intervention-Slope change     | 0.056                 | 0.147   | -0.020~0.131  | 0.924                 | 0.002   | 0.357~1.491   |
| <b>6-month lag</b>            |                       |         |               |                       |         |               |
| Baseline intercept            | 7.86                  | <0.001  | 5.64~10.08    | 50.04                 | <0.001  | 40.68~59.39   |
| Baseline slope                | 0.022                 | 0.005   | 0.007~0.036   | 0.051                 | 0.032   | 0.004~0.098   |
| Intervention-Intercept change | 0.087                 | 0.740   | -0.430~0.603  | 0.335                 | 0.821   | -2.593~3.264  |
| Intervention-Slope change     | 0.077                 | 0.410   | -0.107~0.261  | 1.590                 | 0.010   | 0.384~2.796   |

The *p* values are two-sided; CI: confidence interval; Baseline: January 1, 2012 to January 31, 2020; Intervention stage: February 1, 2020 to December 31, 2020.

**Supplementary Table 2.** Interrupted time series analysis of monthly preterm birth rate in singleton and multiple pregnancies in China, 2016-2020.

|                               | Singleton births      |                 |               | Multiple births       |                 |               |
|-------------------------------|-----------------------|-----------------|---------------|-----------------------|-----------------|---------------|
|                               | $\beta$ (Coefficient) | <i>P</i> -value | 95%CI         | $\beta$ (Coefficient) | <i>P</i> -value | 95%CI         |
| <b>Preterm</b>                |                       |                 |               |                       |                 |               |
| Baseline intercept            | 17.71                 | <0.001          | 12.54~22.87   | 61.37                 | <0.001          | 42.12~80.62   |
| Baseline slope                | 0.023                 | 0.037           | 0.001~0.045   | 0.147                 | 0.011           | 0.035~0.259   |
| Intervention-Intercept change | -0.594                | 0.008           | -1.029~-0.159 | -4.076                | <0.001          | -5.725~-2.426 |
| Intervention-Slope change     | 0.130                 | <0.001          | 0.089~0.171   | 0.774                 | <0.001          | 0.471~1.077   |
| <b>Very preterm</b>           |                       |                 |               |                       |                 |               |
| Baseline intercept            | 1.01                  | 0.003           | 0.37~1.65     | 2.74                  | 0.344           | -3.01~8.48    |
| Baseline slope                | -0.001                | 0.415           | -0.004~0.002  | 0.015                 | 0.481           | -0.026~0.055  |
| Intervention-Intercept change | 0.006                 | 0.802           | -0.041~0.053  | 0.030                 | 0.955           | -1.033~1.094  |
| Intervention-Slope change     | 0.012                 | <0.001          | 0.007~0.016   | 0.032                 | 0.824           | -0.257~0.322  |
| <b>Moderate preterm</b>       |                       |                 |               |                       |                 |               |
| Baseline intercept            | 1.51                  | <0.001          | 0.87~2.16     | 8.19                  | 0.072           | -0.75~17.13   |
| Baseline slope                | -0.000                | 0.983           | -0.003~0.004  | 0.049                 | 0.087           | -0.007~0.105  |
| Intervention-Intercept change | -0.046                | 0.125           | -0.104~0.013  | -1.279                | 0.025           | -2.391~-0.167 |
| Intervention-Slope change     | 0.012                 | 0.001           | 0.005~0.019   | 0.095                 | 0.434           | -0.146~0.336  |
| <b>Late preterm</b>           |                       |                 |               |                       |                 |               |
| Baseline intercept            | 15.18                 | <0.001          | 10.76~19.60   | 50.44                 | <0.001          | 37.97~62.91   |
| Baseline slope                | 0.024                 | 0.005           | 0.008~0.041   | 0.084                 | 0.037           | 0.005~0.162   |
| Intervention-Intercept change | -0.555                | 0.001           | -0.863~-0.247 | -2.827                | 0.004           | -4.729~-0.924 |
| Intervention-Slope change     | 0.106                 | <0.001          | 0.078~0.134   | 0.648                 | <0.001          | 0.414~0.881   |
| <b>Spontaneous preterm</b>    |                       |                 |               |                       |                 |               |
| Baseline intercept            | 11.68                 | <0.001          | 8.51~14.85    | 24.62                 | <0.001          | 16.05~33.21   |

|                               |        |        |               |        |        |               |
|-------------------------------|--------|--------|---------------|--------|--------|---------------|
| Baseline slope                | 0.015  | 0.021  | 0.002~0.028   | 0.024  | 0.498  | -0.046~0.094  |
| Intervention-Intercept change | -0.434 | <0.001 | -0.668~-0.201 | -1.868 | <0.001 | -2.683~-1.053 |
| Intervention-Slope change     | 0.066  | <0.001 | 0.034~0.097   | 0.293  | <0.001 | 0.135~0.451   |
| <b>Iatrogenic preterm</b>     |        |        |               |        |        |               |
| Baseline intercept            | 6.03   | <0.001 | 3.55~8.50     | 36.74  | <0.001 | 23.28~50.20   |
| Baseline slope                | 0.008  | 0.087  | -0.001~0.017  | 0.123  | 0.004  | 0.042~0.204   |
| Intervention-Intercept change | -0.160 | 0.111  | -0.358~0.038  | -2.208 | 0.060  | -4.514~0.098  |
| Intervention-Slope change     | 0.064  | <0.001 | 0.042~0.086   | 0.481  | 0.032  | 0.042~0.921   |

---

The p values are two-sided; CI: confidence interval; Baseline: January 1, 2012 to January 31, 2020; Intervention stage: February 1, 2020 to December 31, 2020.

**Supplementary Table 3.** Interrupted time series analysis of monthly preterm birth rate in singleton and multiple pregnancies in China, 2012-2020 (the perinatal birth definition of gestational age above 22w was used).

|                               | Singleton births      |                 |               | Multiple births       |                 |               |
|-------------------------------|-----------------------|-----------------|---------------|-----------------------|-----------------|---------------|
|                               | $\beta$ (Coefficient) | <i>P</i> -value | 95% CI        | $\beta$ (Coefficient) | <i>P</i> -value | 95% CI        |
| <b>Preterm</b>                |                       |                 |               |                       |                 |               |
| Baseline intercept            | 9.13                  | <0.001          | 6.25~12.01    | 51.34                 | <0.001          | 40.73~61.96   |
| Baseline slope                | 0.032                 | 0.001           | 0.013~0.051   | 0.066                 | 0.019           | 0.011~0.120   |
| Intervention-Intercept change | -0.709                | 0.001           | -1.128~-0.289 | -3.053                | <0.001          | -4.810~-1.295 |
| Intervention-Slope change     | 0.104                 | <0.001          | 0.056~0.152   | 0.827                 | <0.001          | 0.406~1.248   |
| <b>Extremely preterm</b>      |                       |                 |               |                       |                 |               |
| Baseline intercept            | 0.18                  | <0.001          | 0.09~0.27     | 0.45                  | 0.504           | -0.88~1.76    |
| Baseline slope                | 0.002                 | <0.001          | 0.001~0.002   | 0.012                 | <0.001          | 0.005~0.018   |
| Intervention-Intercept change | -0.03                 | 0.021           | -0.055~-0.005 | -0.505                | 0.006           | -0.862~-0.147 |
| Intervention-Slope change     | 0.009                 | <0.001          | 0.005~0.012   | 0.096                 | 0.006           | 0.028~0.165   |
| <b>Very preterm</b>           |                       |                 |               |                       |                 |               |
| Baseline intercept            | 0.78                  | <0.001          | 0.47~1.09     | 4.66                  | 0.006           | 1.38~7.93     |
| Baseline slope                | 0.003                 | 0.027           | 0.000~0.005   | 0.010                 | 0.293           | -0.009~0.030  |
| Intervention-Intercept change | -0.025                | 0.341           | -0.077~0.027  | 0.175                 | 0.731           | -0.829~1.178  |
| Intervention-Slope change     | 0.005                 | 0.203           | -0.003~0.013  | 0.023                 | 0.859           | -0.236~0.282  |
| <b>Moderate preterm</b>       |                       |                 |               |                       |                 |               |
| Baseline intercept            | 1.06                  | <0.001          | 0.66~1.47     | 6.22                  | 0.019           | 1.06~11.39    |
| Baseline slope                | 0.003                 | 0.069           | 0.000~0.005   | -0.002                | 0.899           | -0.026~0.023  |
| Intervention-Intercept change | -0.073                | 0.005           | -0.124~-0.023 | -0.394                | 0.335           | -1.200~0.413  |
| Intervention-Slope change     | 0.008                 | 0.003           | 0.003~0.013   | 0.105                 | 0.110           | -0.024~0.234  |
| <b>Late preterm</b>           |                       |                 |               |                       |                 |               |
| Baseline intercept            | 7.11                  | <0.001          | 4.55~9.67     | 40.01                 | <0.001          | 31.30~48.73   |
| Baseline slope                | 0.025                 | 0.002           | 0.009~0.041   | 0.045                 | 0.061           | -0.002~0.093  |

|                               |        |        |               |        |        |               |
|-------------------------------|--------|--------|---------------|--------|--------|---------------|
| Intervention-Intercept change | -0.581 | 0.001  | -0.925~-0.236 | -2.329 | <0.001 | -3.558~1.100  |
| Intervention-Slope change     | 0.082  | <0.001 | 0.051~0.114   | 0.602  | <0.001 | 0.436~0.769   |
| <b>Spontaneous preterm</b>    |        |        |               |        |        |               |
| Baseline intercept            | 5.58   | <0.001 | 3.63~7.53     | 20.33  | <0.001 | 13.67~26.98   |
| Baseline slope                | 0.021  | 0.004  | 0.007~0.035   | 0.045  | 0.029  | 0.005~0.085   |
| Intervention-Intercept change | -0.489 | 0.003  | -0.805~-0.173 | -1.993 | 0.006  | -3.389~-0.597 |
| Intervention-Slope change     | 0.039  | 0.088  | -0.006~0.083  | 0.193  | 0.164  | -0.080~0.465  |
| <b>Iatrogenic preterm</b>     |        |        |               |        |        |               |
| Baseline intercept            | 3.55   | <0.001 | 2.55~4.55     | 31.02  | <0.001 | 22.40~39.63   |
| Baseline slope                | 0.011  | <0.001 | 0.005~0.017   | 0.021  | 0.392  | -0.027~0.068  |
| Intervention-Intercept change | -0.219 | 0.008  | -0.340~-0.059 | -1.060 | 0.205  | -2.708~0.590  |
| Intervention-Slope change     | 0.065  | <0.001 | 0.042~0.089   | 0.634  | <0.001 | 0.287~0.982   |

The p values are two-sided; CI: confidence interval; Baseline: January 1, 2012 to January 31, 2020; Intervention stage: February 1, 2020 to December 31, 2020.
