# Supplementary material
Source: PubMed Central journal article supplement (PMC9440898)
Supplement: 41467_2022_32814_MOESM2_ESM.pdf [file 41467_2022_32814_MOESM2_ESM.pdf]

## **Description of Additional Supplementary Files**

File Name: Supplementary Software 1

Description: Includes a Stata code file of ITSA analysis among singleton births (multiple births are similar), a SAS code file for Cochran Armitage test, and an introduction file of variables in original datasets.
